# Supplementary material for: A polygenic score associated with fracture risk in breast cancer patients treated with aromatase inhibitors
Source: PubMed Central journal article supplement (PMC10799916; doi:10.1038/s41523-024-00615-9), 2024-01-20

**Supplementary Table 1.** gSOS and femoral bone mineral density by duration of aromatase inhibitor (AI) treatment

| AI Duration   | # Fracture/non-fracture | PGS, mean (std) |              |          | Femoral BMD, mean (std) |              |          |
|---------------|-------------------------|-----------------|--------------|----------|-------------------------|--------------|----------|
|               |                         | Fracture        | Non-fracture | P-value* | Fracture                | Non-fracture | P-value* |
| ≤1.0 year     | 73/319                  | -0.59 (0.5)     | -0.47 (0.45) | 0.07     | 0.69 (0.12)             | 0.76 (0.12)  | 0.008    |
| 1.1-2.0 years | 47/191                  | -0.57 (0.47)    | -0.43 (0.45) | 0.08     | 0.71 (0.11)             | 0.74 (0.13)  | 0.42     |
| 2.1-3.0 years | 34/128                  | -0.56 (0.4)     | -0.53 (0.51) | 0.73     | 0.76 (0.14)             | 0.72 (0.12)  | 0.46     |
| 3.1-4.0 years | 35/166                  | -0.69 (0.32)    | -0.41 (0.44) | 0.0002   | 0.65 (0.11)             | 0.78 (0.15)  | 0.01     |
| 4.1-5.0 years | 73/638                  | -0.56 (0.47)    | -0.43 (0.47) | 0.04     | 0.69 (0.09)             | 0.75 (0.12)  | 0.008    |
| 5.1-6.0 years | 30/235                  | -0.56 (0.43)    | -0.43 (0.46) | 0.13     | 0.77 (0.1)              | 0.76 (0.13)  | 0.74     |
| >6.0 years    | 18/163                  | -0.73 (0.35)    | -0.40 (0.42) | 0.005    | 0.84 (0.09)             | 0.74 (0.11)  | 0.36     |

Footnote: \* P-values derived from log-rank test of binary PGS (high vs. low by median) with fracture.

**Supplementary Table 2.** Multivariable associations of gSOS tertiles with fracture risk in breast cancer patients on aromatase inhibitors (AI) among patients with baseline bone mineral density data

| gSOS PGS  | Model 1*         |         | Model 2†         |         | Model 3‡         |         |
|-----------|------------------|---------|------------------|---------|------------------|---------|
|           | HR (95% CI)      | P trend | HR (95% CI)      | P trend | HR (95% CI)      | P trend |
| Tertile 1 | 1.00             | 0.004   | 1.00             | 0.004   | 1.00             | 0.03    |
| Tertile 2 | 0.67 (0.46-0.96) |         | 0.66 (0.46-0.95) |         | 0.71 (0.49-1.02) |         |
| Tertile 3 | 0.54 (0.37-0.79) |         | 0.54 (0.37-0.79) |         | 0.62 (0.42-0.91) |         |

\* Model 1: Adjusted for age at diagnosis

† Model 2: Adjusted for age at diagnosis, prior history of osteoporosis, prior history of major fracture, race and ethnicity, cancer treatment, and AI treatment as a time-varying variable

‡ Model 3: Adjusted for the same covariates as in Model 2 plus BMD at the hip.

**Supplementary Table 3.** Multivariable associations of gSOS tertiles with fracture risk in breast cancer patients on aromatase inhibitors (AI) stratified by self-reported ethnicity

| gSOS PGS                  | Model 1*<br>HR (95% CI) | P-value  | Model 2†<br>HR (95% CI) | P-value  | Model 3‡<br>HR (95% CI) | P-value |
|---------------------------|-------------------------|----------|-------------------------|----------|-------------------------|---------|
| <i>Non-Hispanic White</i> |                         |          |                         |          |                         |         |
| T1                        | 1.00                    | 9.48E-06 | 1.00                    | 1.23E-05 | 1.00                    | 0.01    |
| T2                        | 0.59 (0.44, 0.79)       |          | 0.58 (0.43, 0.79)       |          | 0.68 (0.46, 0.99)       |         |
| T3                        | 0.49 (0.36, 0.67)       |          | 0.49 (0.36, 0.68)       |          | 0.54 (0.36, 0.83)       |         |
| <i>Non-Hispanic Black</i> |                         |          |                         |          |                         |         |
| T1                        | 1.00                    | 0.48     | 1.00                    | 0.51     | 1.00                    | 0.85    |
| T2                        | 1.18 (0.16, 8.47)       |          | 1.14 (0.13, 10.3)       |          | 1.71 (0.07, 39.39)      |         |
| T3                        | 2.42 (0.47, 12.49)      |          | 2.37 (0.43, 12.91)      |          | 1.9 (0.2, 18.36)        |         |
| <i>Asian</i>              |                         |          |                         |          |                         |         |
| T1                        | 1.00                    | 0.13     | 1.00                    | 0.20     | 1.00                    | na      |
| T2                        | 0.62 (0.17, 2.23)       |          | 0.48 (0.11, 2.12)       |          | na                      |         |
| T3                        | 0.16 (0.02, 1.36)       |          | 0.17 (0.02, 1.59)       |          | na                      |         |
| <i>Hispanic</i>           |                         |          |                         |          |                         |         |
| T1                        | 1.00                    | 0.81     | 1.00                    | 0.75     | 1.00                    | 0.64    |
| T2                        | 0.71 (0.24, 2.13)       |          | 0.72 (0.23, 2.24)       |          | 0.49 (0.04, 5.62)       |         |
| T3                        | 0.92 (0.33, 2.56)       |          | 0.63 (0.18, 2.19)       |          | 1.39 (0.26, 7.51)       |         |

\* Model 1: Adjusted for age at diagnosis

† Model 2: Adjusted for age at diagnosis, prior history of osteoporosis, prior history of major fracture, race and ethnicity, cancer treatment, and AI treatment as a time-varying variable

‡ Model 3: Adjusted for the same covariates as in Model 2 plus BMD at the hip.

**Supplementary Figure 1.** Correlation plot of gSOS and baseline bone mineral density at the time close to the initiation of aromatase inhibitor (AI) treatment

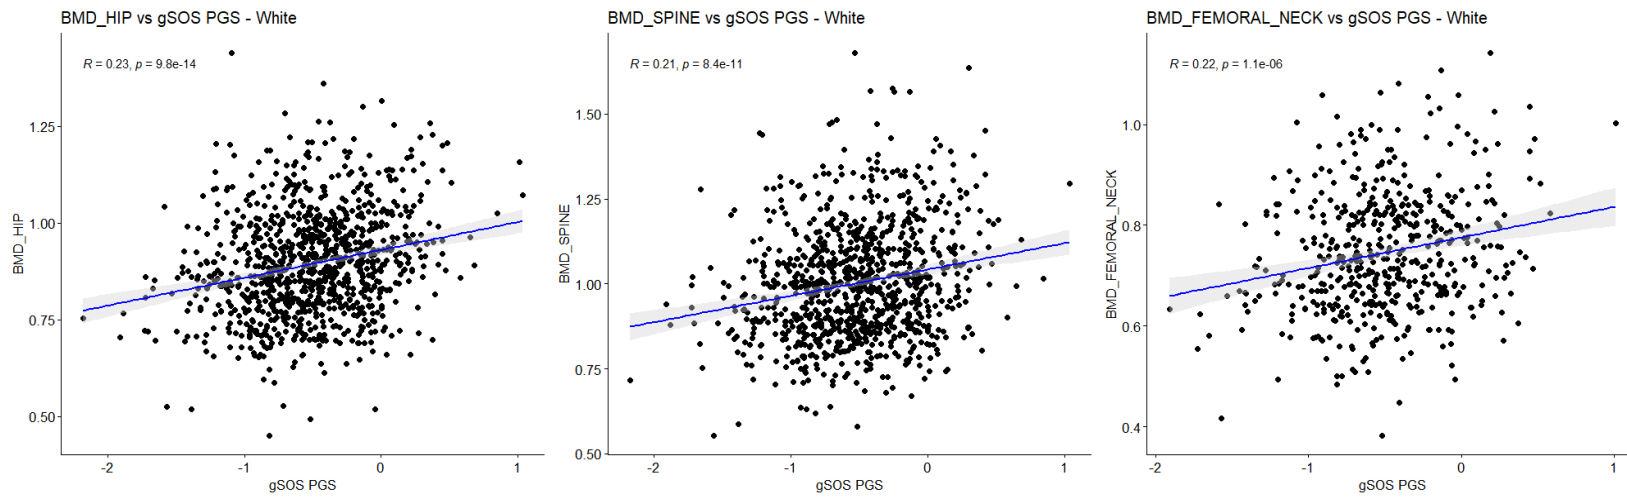

**Supplementary Figure 2.** Kaplan-Meier curves of fracture by tertile of gSOS in breast cancer patients treated with aromatase inhibitors by race and ethnicity

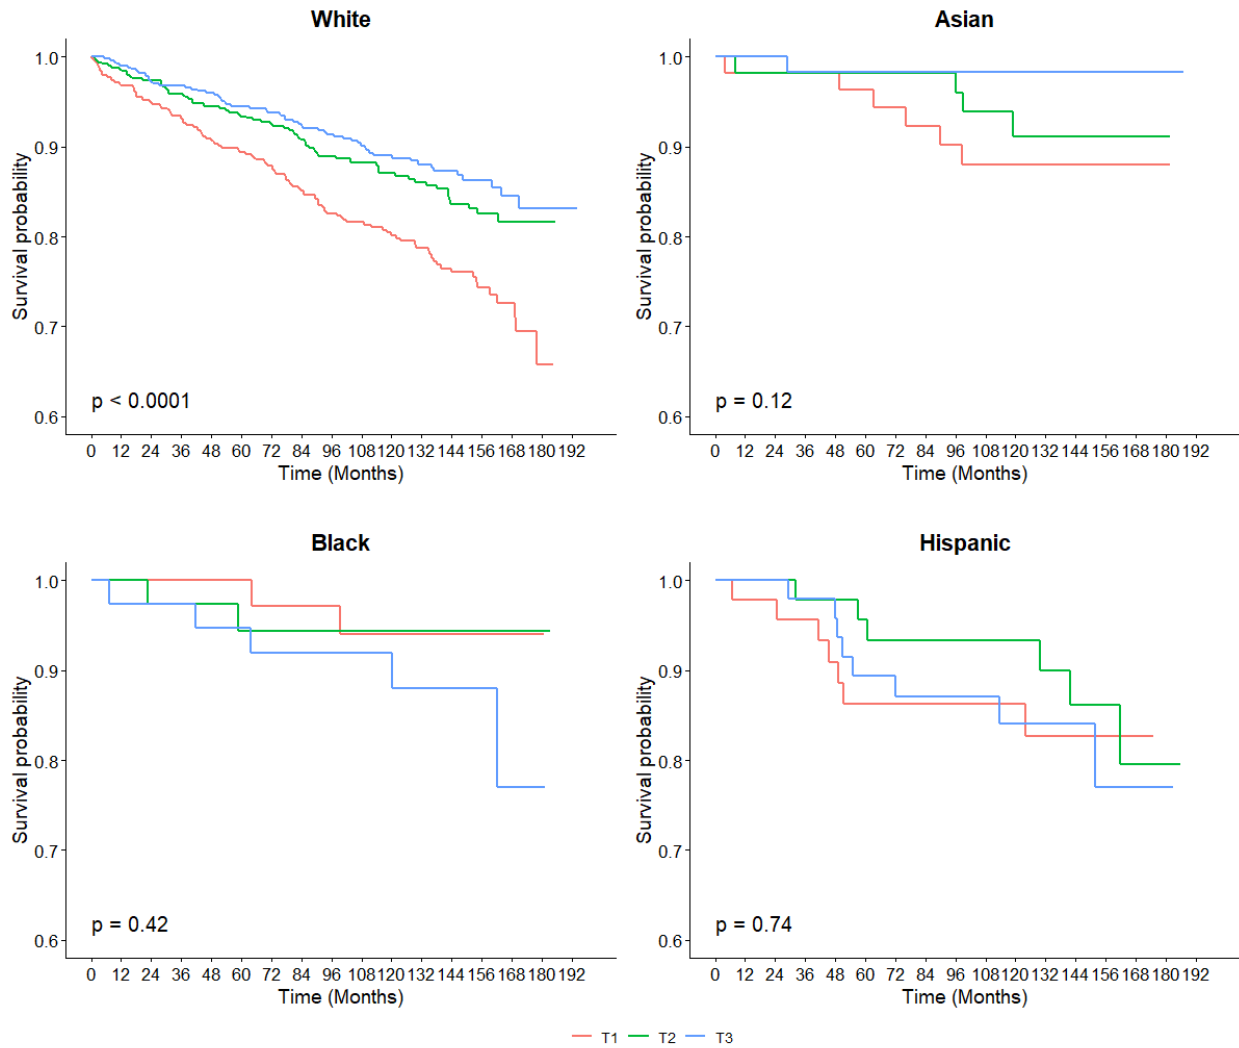

Supplement: 41523_2024_615_MOESM1_ESM.pdf [file 41523_2024_615_MOESM1_ESM.pdf]
